# Supplementary material for: Emergence of genotype C1 Enterovirus A71 and its link with antigenic variation of virus in Taiwan
Source: PubMed Central journal article supplement (PMC7521691; doi:10.1371/journal.ppat.1008857), 2020-09-16
Supplement: ppat.1008857.s004.pdf [file ppat.1008857.s004.pdf]

**S1 Table. Demographic and clinical characteristics of enrolled patients with acute EV-A71 infections from 2018 to early 2019.**

| Subject | Age (years) | Myoclonic jerk | Severe neurological involvement <sup>a</sup> | IVIG usage | Isolated EV-A71 (genotype) |
|---------|-------------|----------------|----------------------------------------------|------------|----------------------------|
| 1       | 3.3         | yes            | yes                                          | yes        | TW-209-2018 (C1)           |
| 2       | 0.2         | yes            | yes                                          | yes        | TW-4002-2018 (C1)          |
| 3       | 3.6         | yes            | yes                                          | yes        | TW-5011-2018 (C1)          |
| 4       | 5.8         | -              | -                                            | -          | TW-6001-2018 (B5)          |
| 5       | 5.6         | yes            | -                                            | -          | TW-6012-2018 (C1)          |
| 6       | 11.2        | -              | -                                            | -          | TW-7001-2018 (C1)          |
| 7       | 11.1        | -              | -                                            | -          | TW-7002-2018 (C1)          |
| 8       | 4.5         | yes            | yes                                          | yes        | TW-7013-2018 (C1)          |
| 9       | 5.8         | yes            | yes                                          | yes        | TW-7019-2018 (C1)          |
| 10      | 4.7         | yes            | yes                                          | yes        | TW-7025-2018 (C1)          |
| 11      | 5.4         | yes            | yes                                          | yes        | TW-7026-2018 (C1)          |
| 12      | 1.4         | -              | -                                            | -          | TW-901-2019 (B5)           |
| 13      | 2.8         | yes            | yes                                          | yes        | NA <sup>b</sup>            |
| 14      | 2.2         | -              | -                                            | -          | TW-112-2019 (C1)           |
| 15      | 0.5         | -              | -                                            | -          | TW-106-2019 (C1)           |
| 16      | 1.1         | -              | -                                            | -          | TW-113-2019 (C1)           |
| 17      | 2.4         | yes            | -                                            | -          | TW-122-2019 (C1)           |
| 18      | 5.2         | -              | -                                            | -          | TW-210-2019 (C1)           |
| 19      | 5.6         | yes            | -                                            | -          | TW-225-2019 (C1)           |
| 20      | 3.5         | yes            | -                                            | -          | TW-3018-2019 (C1)          |
| 21      | 4.8         | -              | -                                            | -          | TW-4015-2019 (C1)          |

<sup>a</sup> Severe neurological involvement was defined as the presence of encephalitis (such as changes in consciousness, seizure, ataxia, or cranial nerve palsy) and/or autonomic nervous system dysregulation (such as tachycardia, hyperthermia, profuse sweating, or transient hypertension) [1].

<sup>b</sup> Subject 13 was diagnosed with acute EV-A71 infection based on positive reverse-transcriptase polymerase chain reaction of EV-A71 of rectal swab. We failed to isolate EV-A71 from rectal and throat swabs from subject 13.

Abbreviations; IVIG, intravenous immunoglobulin; TW, Taiwan.
