# Supplementary material for: Emergence of genotype C1 Enterovirus A71 and its link with antigenic variation of virus in Taiwan
Source: PubMed Central journal article supplement (PMC7521691; doi:10.1371/journal.ppat.1008857), 2020-09-16
Supplement: ppat.1008857.s006.pdf [file ppat.1008857.s006.pdf]

**S3 Table. Convalescent sera from patients with acute EV-A71 infections, 2014-2017.**

| Serum     | Age (years) | Severe neurological involvement <sup>a</sup> | IVIg usage | Exposed EV-A71 (genotype) |
|-----------|-------------|----------------------------------------------|------------|---------------------------|
| EV-A71-1  | 1.4         | -                                            | -          | B5                        |
| EV-A71-2  | 3.9         | -                                            | -          | B5                        |
| EV-A71-3  | 0.7         | yes                                          | yes        | C4                        |
| EV-A71-4  | 4.8         | -                                            | -          | B5                        |
| EV-A71-5  | 3.8         | -                                            | -          | B5                        |
| EV-A71-6  | 3.7         | yes                                          | yes        | C4                        |
| EV-A71-7  | 3.4         | -                                            | -          | B5                        |
| EV-A71-8  | 3.8         | -                                            | -          | B5                        |
| EV-A71-9  | 3.2         | -                                            | -          | B5                        |
| EV-A71-10 | 5.0         | -                                            | -          | C4                        |
| EV-A71-11 | 5.0         | -                                            | -          | B5                        |
| EV-A71-12 | 4.4         | -                                            | -          | B5                        |
| EV-A71-13 | 0.8         | -                                            | -          | B5                        |
| EV-A71-14 | 5.8         | -                                            | -          | B5                        |
| EV-A71-15 | 2.0         | -                                            | -          | B5                        |
| EV-A71-16 | 1.9         | -                                            | -          | B5                        |
| EV-A71-17 | 3.1         | -                                            | -          | B5                        |
| EV-A71-18 | 4.0         | -                                            | -          | B5                        |
| EV-A71-19 | 2.7         | -                                            | -          | B5                        |
| EV-A71-20 | 1.4         | -                                            | -          | B5                        |
| EV-A71-21 | 5.1         | -                                            | -          | B5                        |
| EV-A71-22 | 2.3         | -                                            | -          | B5                        |
| EV-A71-23 | 1.5         | -                                            | -          | B5                        |

<sup>a</sup> Severe neurological involvement was defined as the presence of encephalitis (such as changes in consciousness, seizure, ataxia, or cranial nerve palsy) and/or autonomic nervous system dysregulation (such as tachycardia, hyperthermia, profuse sweating, or transient hypertension) [1].

Abbreviations: IVIG, intravenous immunoglobulin.
