# Supplementary material for: Emergence of genotype C1 Enterovirus A71 and its link with antigenic variation of virus in Taiwan
Source: PubMed Central journal article supplement (PMC7521691; doi:10.1371/journal.ppat.1008857), 2020-09-16
Supplement: ppat.1008857.s007.pdf [file ppat.1008857.s007.pdf]

**S4 Table. Primers for sequencing of VP1, VP2 and VP3 of EV-A71 in the study.**

| Genotype         | Forward (5'-3')           | Reverse (5'-3')           |
|------------------|---------------------------|---------------------------|
| <b><i>C1</i></b> |                           |                           |
| VP1              | GCAGCAGCCCAGAAAAA         | AAGGTTTGCCCAATCATTGTG     |
| VP2              | ACAGAGCCTTAAACAAGATCCAGAT | AAAGTTCGGCAGGATGGGTGC     |
| VP3              | TTCGACCAAGGAGCGACAC       | CTGTAGGCGCTGGTAAAGC       |
| <b><i>C4</i></b> |                           |                           |
| VP1              | GCGGCAGCCCAAAGAA          | AAGATTTGCCCAATCATTGTG     |
| VP2              | ACAGAGTCTCAAGCAGGAT       | GAAGTTTGGTAGAATAGGTGC     |
| VP3              | TACGACCAAGGAGCGACGC       | CTGTGGGTGCTGGTAGAGC       |
| <b><i>B5</i></b> |                           |                           |
| VP1              | ACCATGAAACTCTGCAAGG       | GAAAAACTGACTGGGTAGTG      |
| VP2              | ACAGAGCCTCAAACAAGAC       | GAAATTTGGCAGAATGGGTGC     |
| VP3              | ATCACTCTAGCTCCAATGTGCTC   | CTACTCACACTGTCTCCTATAGAGC |
